# Supplementary material
Source: publisher figshare collection journal article supplement (https://frontiersin.figshare.com/ndownloader/files/24599702)
Supplement: Supplementary file [file 24599702]

## D8 Blastocysts

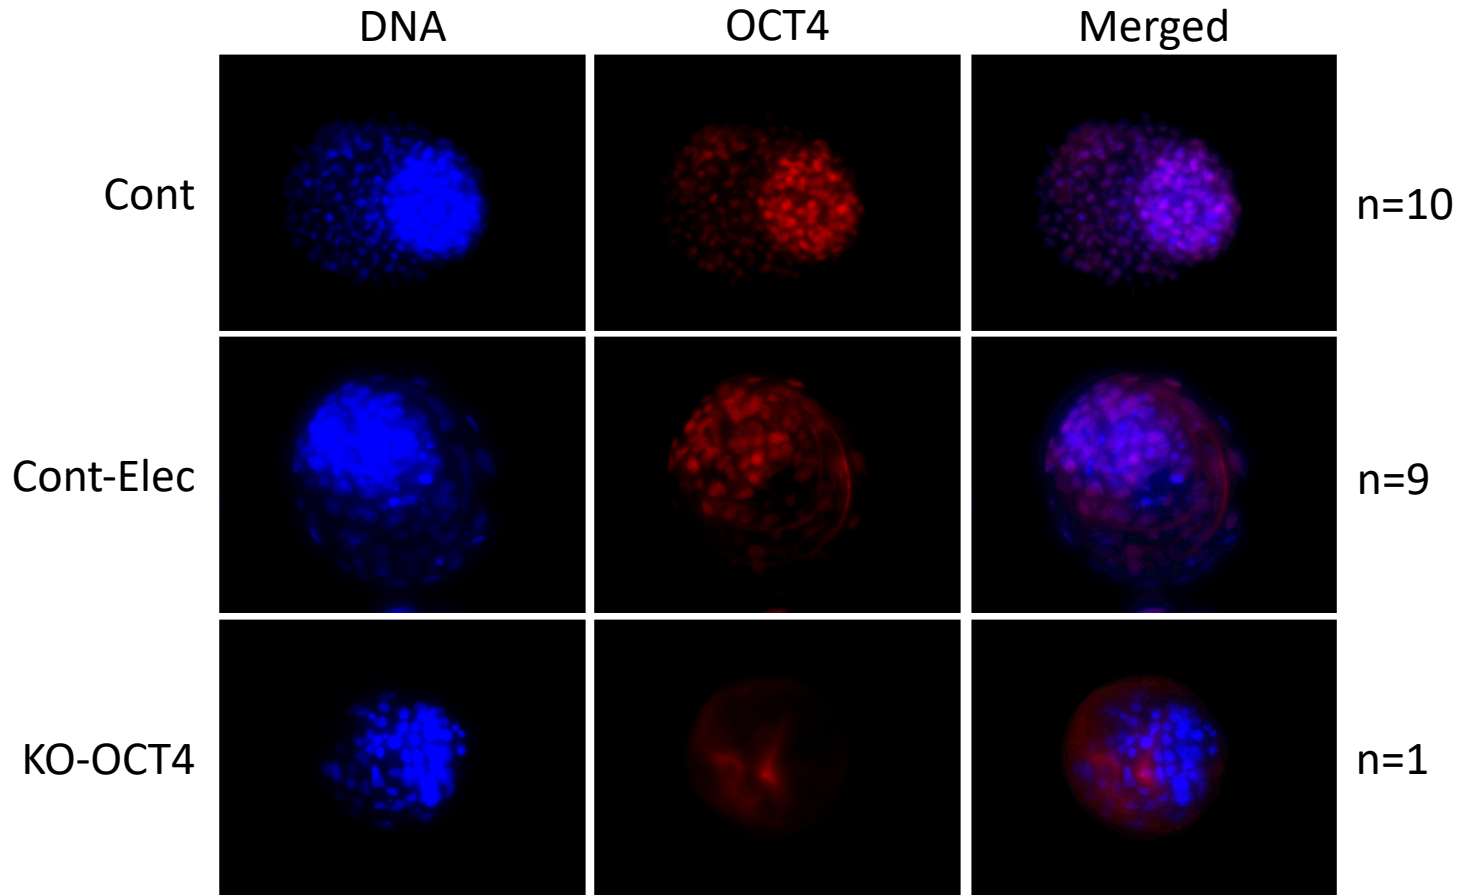

**SUPPLEMENTARY FIGURE 1** | Immunofluorescence analysis of OCT4 expression in blastocysts collected 192h post in vitro fertilization (D8) in control (Cont), control electroporation (Cont-Elect) and OCT4-targeting RNPs electroporation (KO-OCT4) groups.
